# Supplementary material for: Impact of pathogenicFBN1variant types on the development of severe scoliosis in patients with Marfan syndrome
Source: HighWire-hosted journal article supplement (doi:10.1136/jmedgenet-2021-108186), 2021-12-16
Supplement: jmedgenet-2021-108186supp002_data_supplement.pdf [file jmedgenet-2021-108186supp002_data_supplement.pdf]

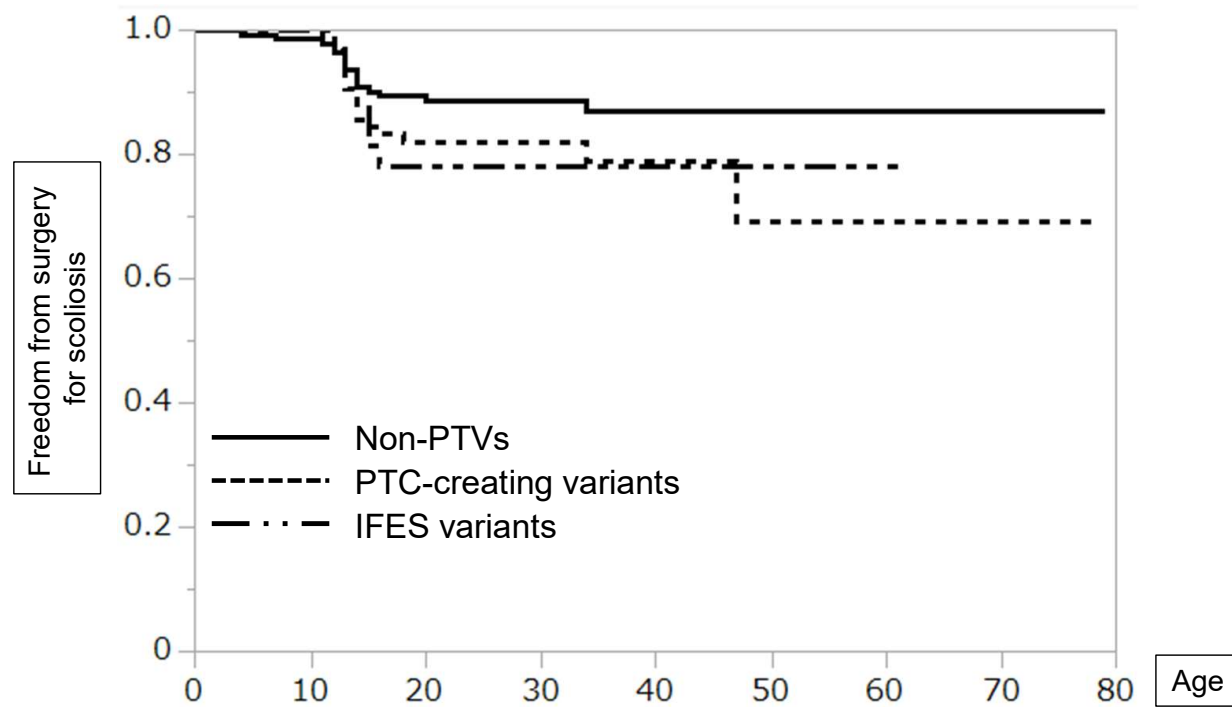

Supplementary Figure 1.

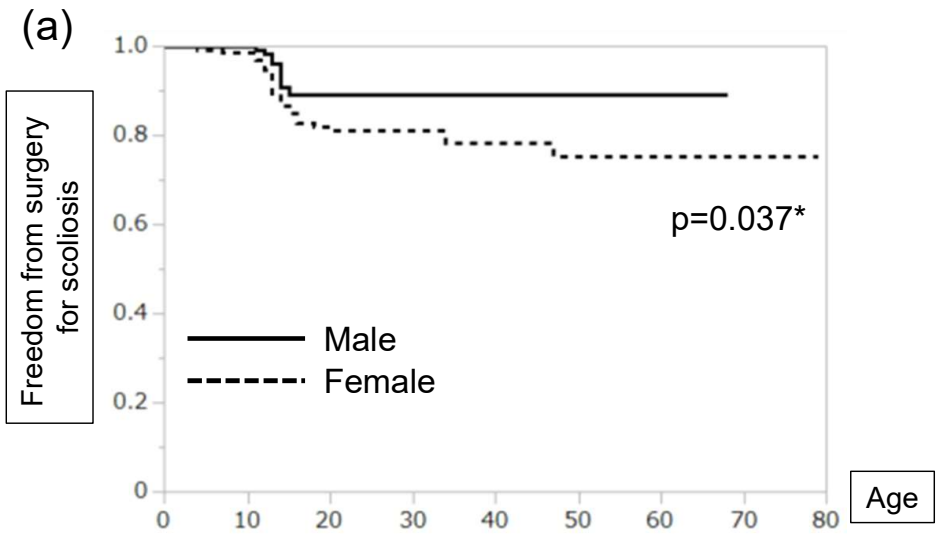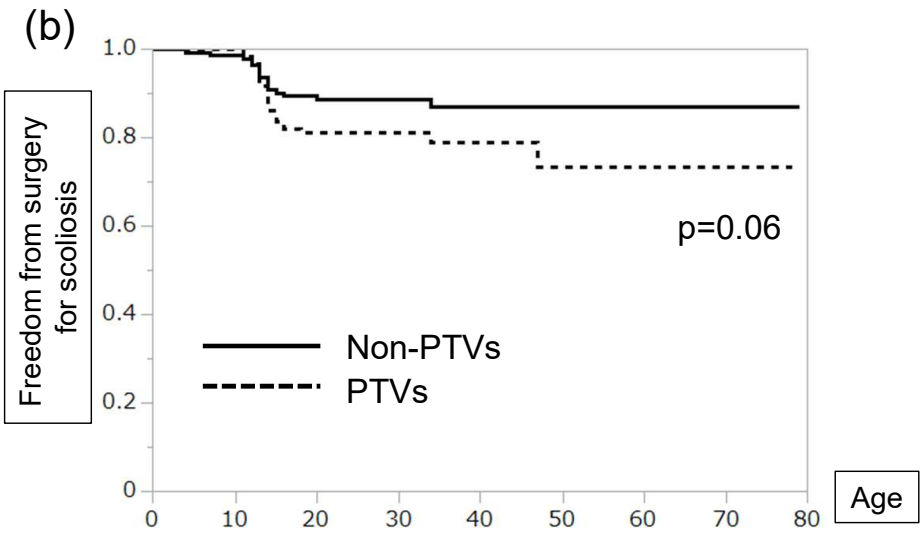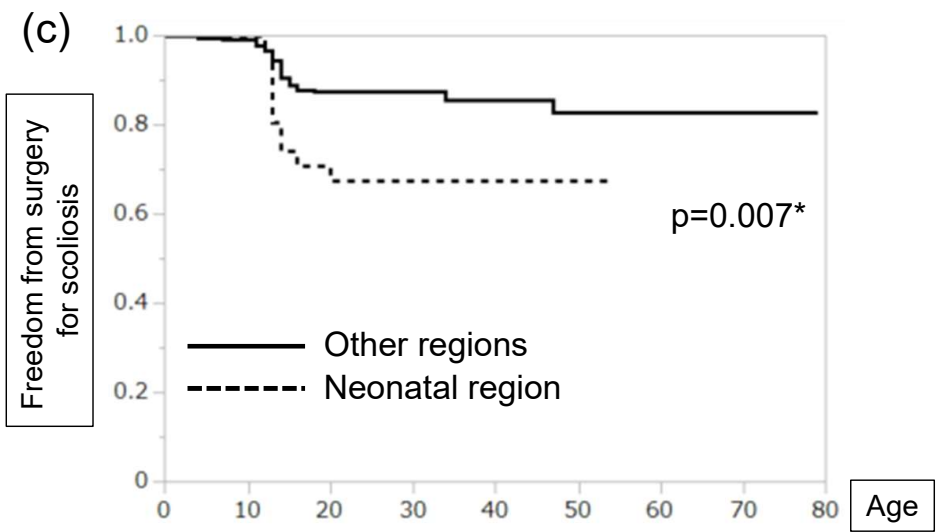

Supplementary Figure 2.

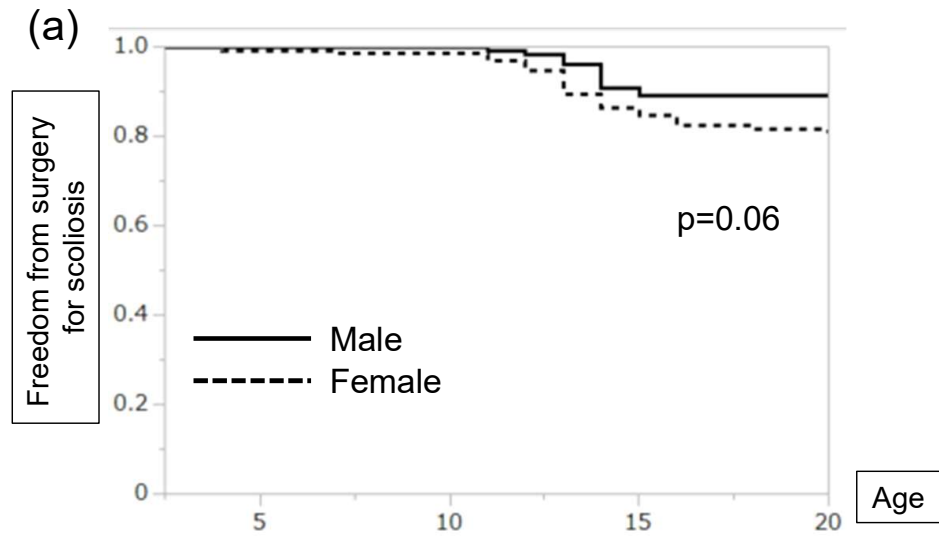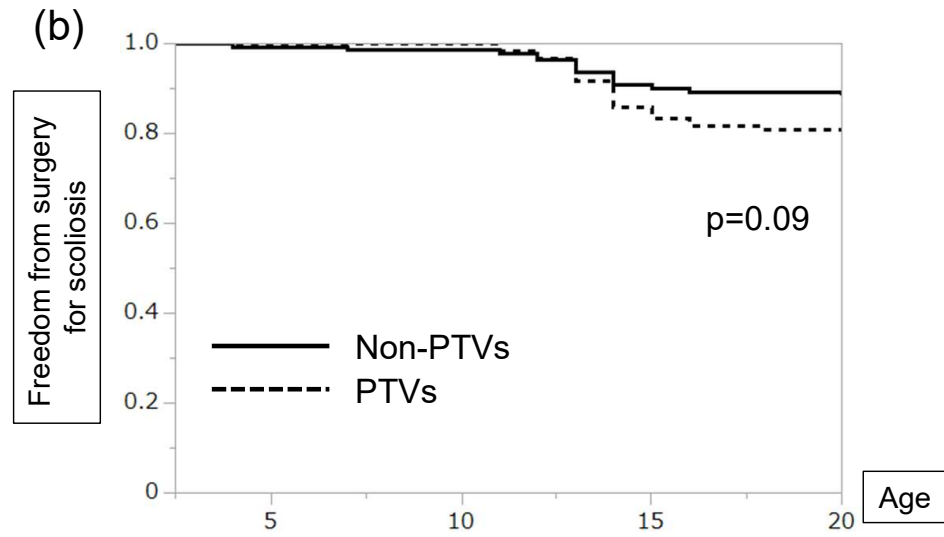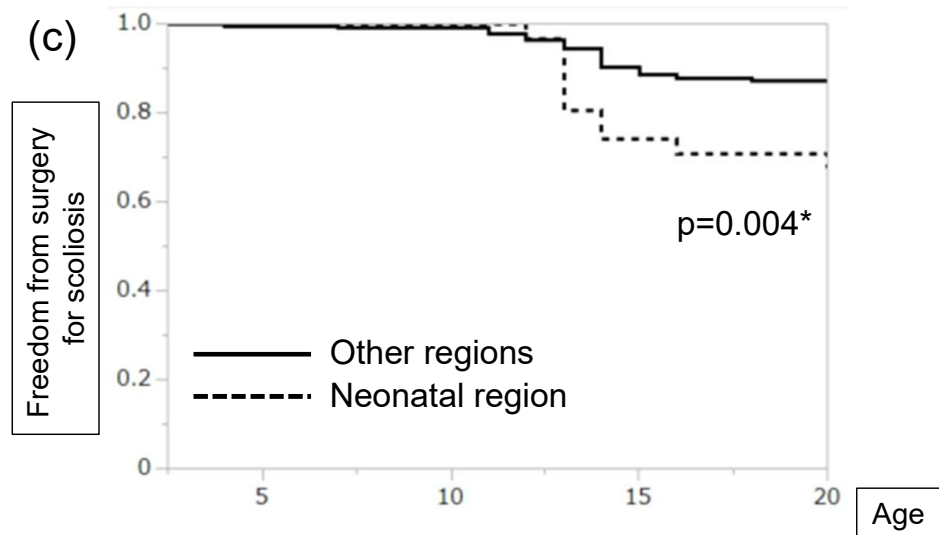

Supplementary Figure 3.

## Supplementary Figure Legends

### Supplementary Figure 1.

A Kaplan–Meier surgery-free curve for scoliosis by *FBN1* variant types, excluding 15 non-surgical severe cases visually indicated the equivalent impact of PTC-creating variants and IFES variants on the development of severe scoliosis. PTV, protein-truncating variant; IFES, in-frame exon-skipping; PTC, premature termination codon

### Supplementary Figure 2.

Kaplan–Meier surgery-free curves for scoliosis, excluding 15 non-surgical severe cases. Kaplan–Meier curves by (a) sex, (b) *FBN1* variant types, and (c) location of *FBN1* variant were constructed. PTV, protein-truncating variant

### Supplementary Figure 3.

Kaplan–Meier surgery-free curves for scoliosis for up to 20 years of age, excluding 15 non-surgical severe cases and three cases underwent surgery past the age of 20. Kaplan–Meier curves by (a) sex, (b) *FBN1* variant types, and (c) location of *FBN1* variant were constructed. PTV, protein-truncating variant
